# Supplementary material for: Recovery from self-assembly: a composite material for lithium–sulfur batteries
Source: Royal Society of Chemistry journal article supplement (doi:10.1039/c4ta00490f), 2014-01-01
Supplement: c4ta00490f1.pdf [file c4ta00490f1.pdf]

## **Supporting Information**

### **Recovery from Self-Assembly: A Composite Material for Lithium-Sulfur Batteries**

Xiaohui Zhao, Dul-Sun Kim, James Manuel, Kwon-Koo Cho, Ki-Won Kim, Hyo-Jun Ahn and Jou-Hyeon Ahn\*

**Table S1. BET specific surface area, pore volume, electric conductivity of AICMK, AICMK/S composites and sulfur content in composites**

| Sample        | Specific surface area<br>[m <sup>2</sup> g <sup>-1</sup> ] | Pore volume<br>[cm <sup>3</sup> g <sup>-1</sup> ] | Sulfur content<br>[wt.%] | Electric conductivity<br>[10 <sup>-2</sup> S cm <sup>-1</sup> ] <sup>a</sup> | Sulfur loading<br>in cathodes<br>[mg cm <sup>-2</sup> ] |
|---------------|------------------------------------------------------------|---------------------------------------------------|--------------------------|------------------------------------------------------------------------------|---------------------------------------------------------|
| AICMK         | 1812                                                       | 2.91                                              | ND <sup>b</sup>          | 9.6                                                                          | /                                                       |
| AICMK/S-0-0   | ND                                                         | ND                                                | 70.0                     | ND                                                                           | 1.0                                                     |
| AICMK/S-20-0  | 37.51                                                      | 0.082                                             | 60.8                     | 4.6                                                                          | 0.7                                                     |
| AICMK/S-20-1  | 41.17                                                      | 0.092                                             | 49.8                     | 5.6                                                                          | 0.7                                                     |
| AICMK/S-20-3  | 45.68                                                      | 0.183                                             | 47.2                     | 5.7                                                                          | 0.7                                                     |
| AICMK/S-20-20 | 51.72                                                      | 0.203                                             | 43.8                     | 6.0                                                                          | 0.6                                                     |

<sup>a</sup>Samples were pressed at a pressure of 1 MPa; <sup>b</sup>Not determined.

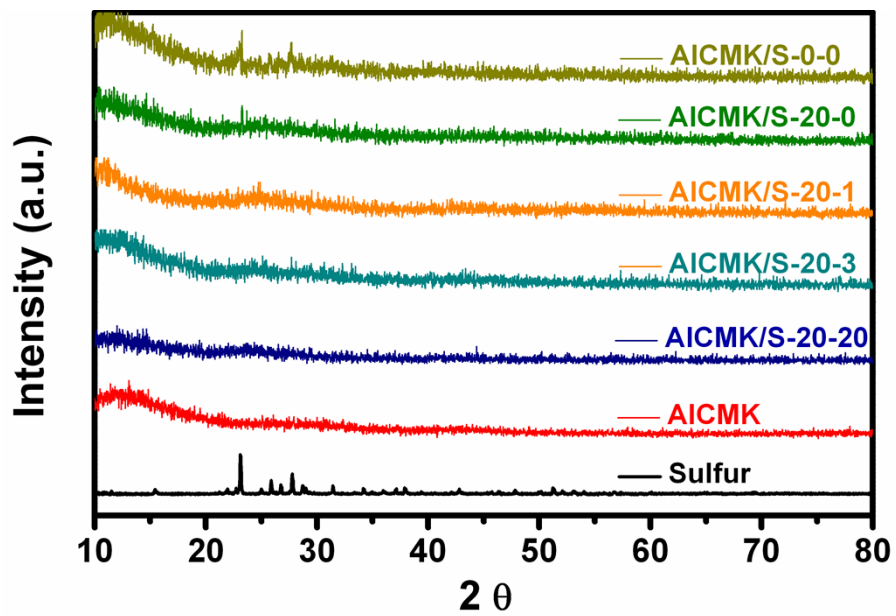

Fig. S1. XRD patterns of sulfur, AICMK and AICMK/S composites.

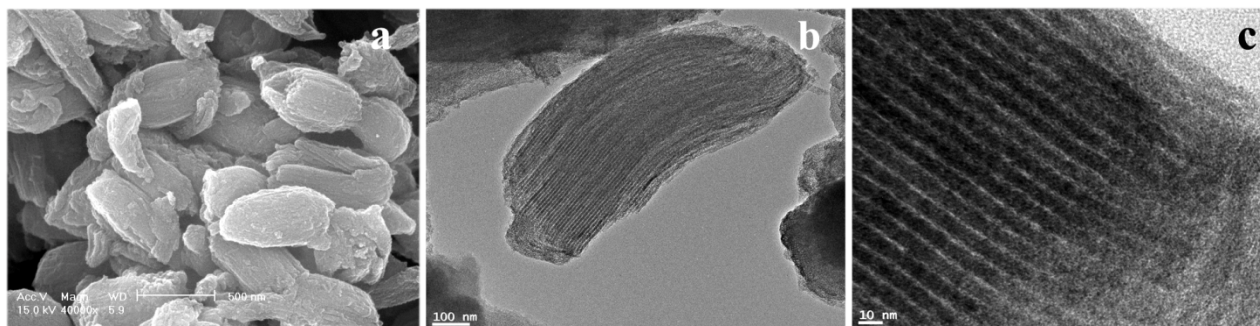

**Fig. S2.** a) FESEM and b,c) TEM images of AlCMK/S-20-20 composite.

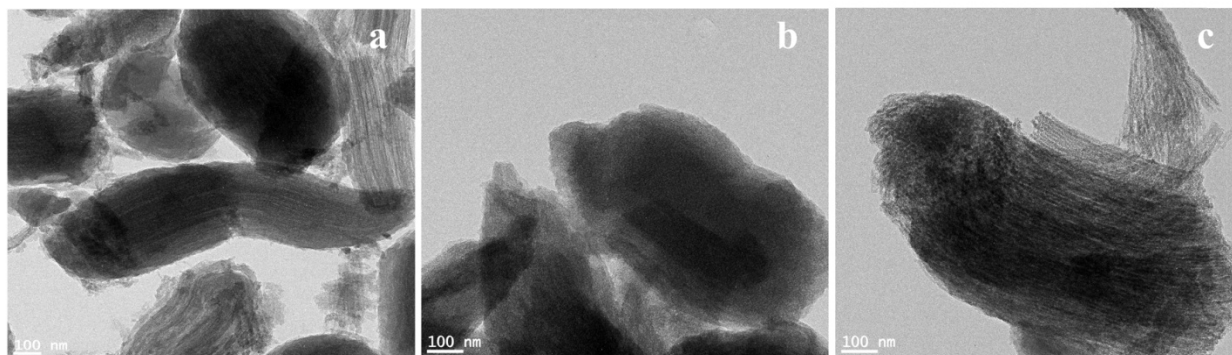

**Fig. S3.** TEM images of AlCMK/S composites, a) AlCMK/S-20-0, b) AlCMK/S-20-1 and c) AlCMK/S-20-3. A trait of Sulfur can be observed to cover the surface of AlCMK or not uniformed dispersed in the carbon matrix.

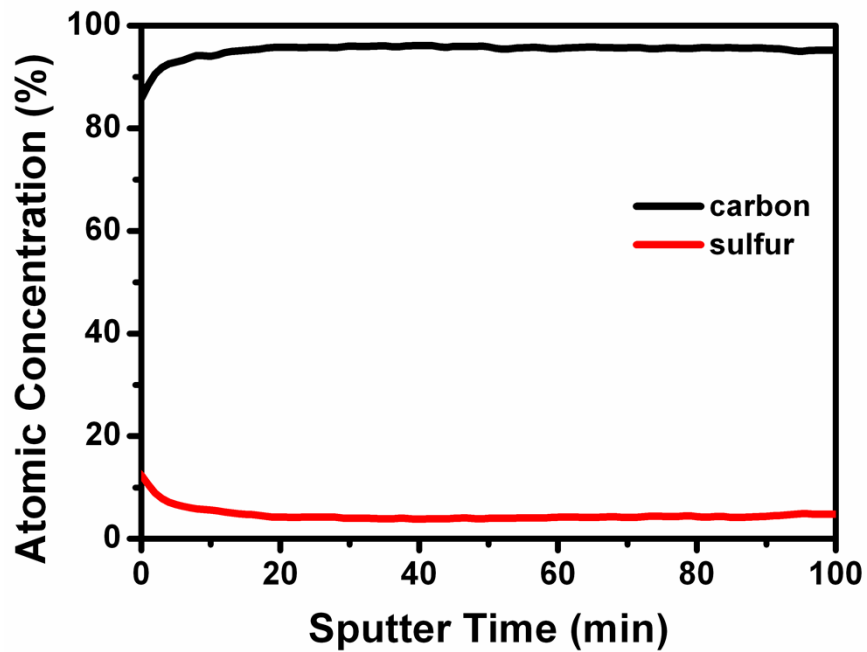

Fig. S4. AES spectrum of AlCMK/S-20-20 composite with sputtering depth.

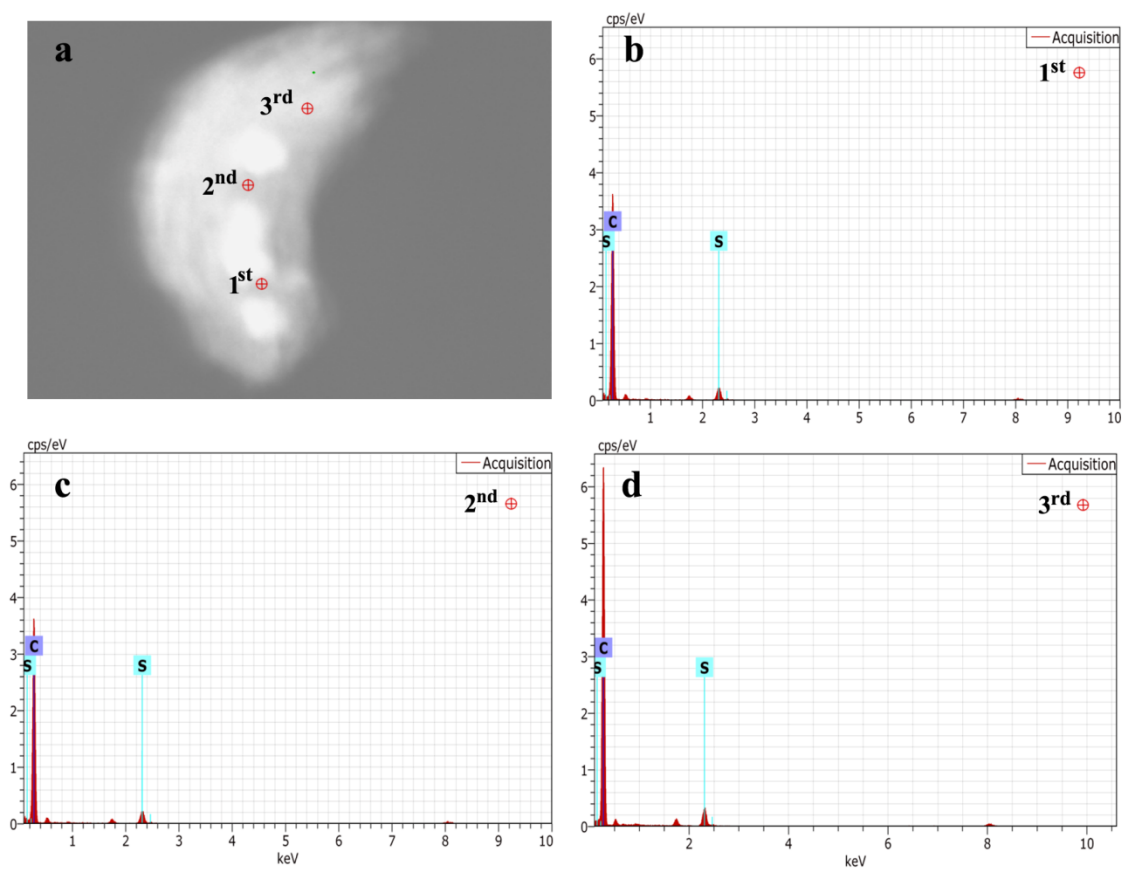

**Fig. S5.** Elemental analysis of different locations in AlCMK/S-20-20 composite. Sulfur and carbon content at the three points are almost the same, which indicates the uniform distribution of sulfur in AlCMK/S-20-20 composite.

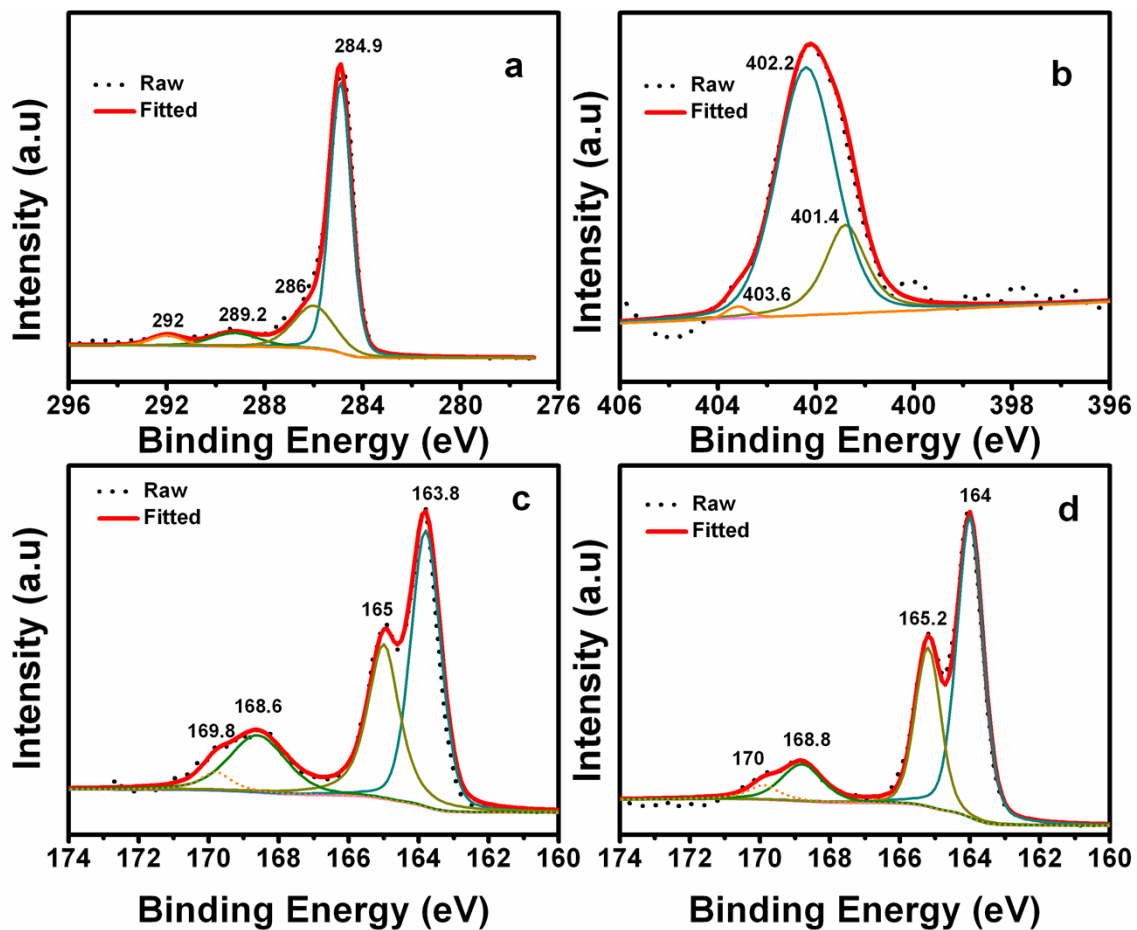

**Fig. S6.** XPS spectra of a) C 1s and b) N 1s in AICMK/S-20-20 composite; XPS spectra of S 2p spectra in c) AICMK/S-20-0 and d) AICMK/S-20-3.

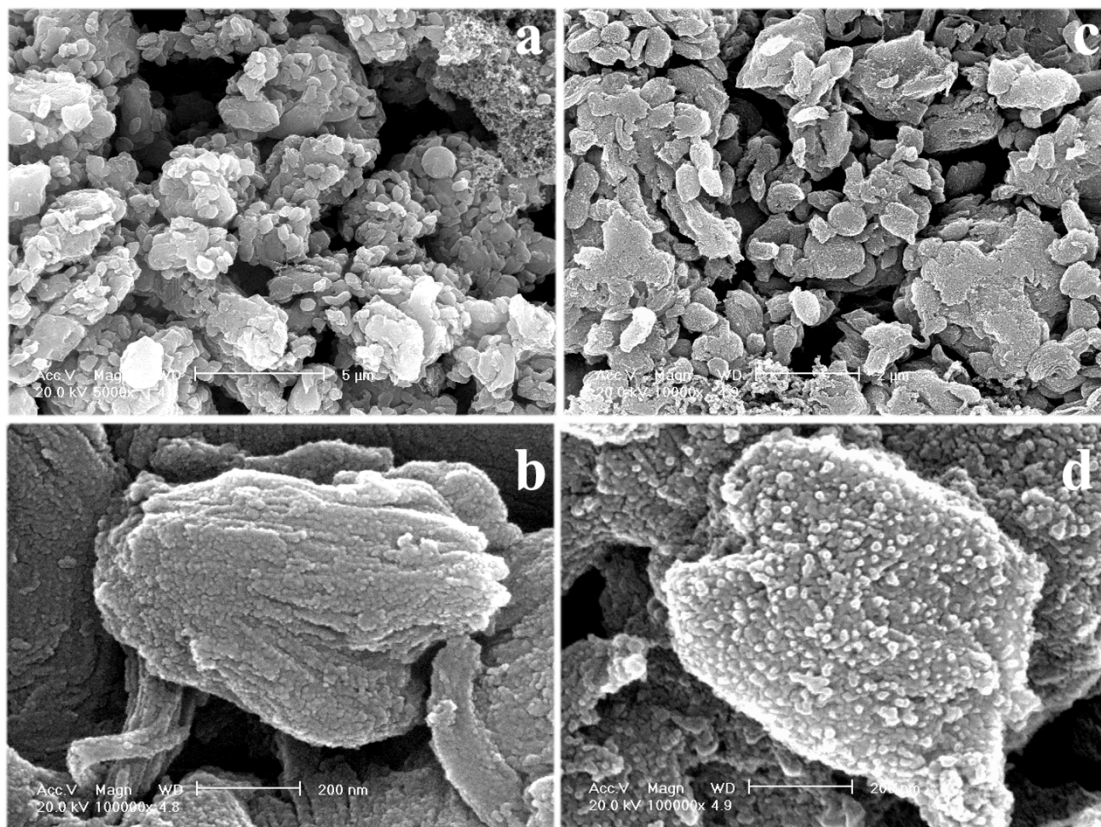

**Fig. S7.** FESEM of AlCMK/S-20-20 cathodes: a,b) fresh cathode and c,d) cathode after 450 cycles at 0.1 C.



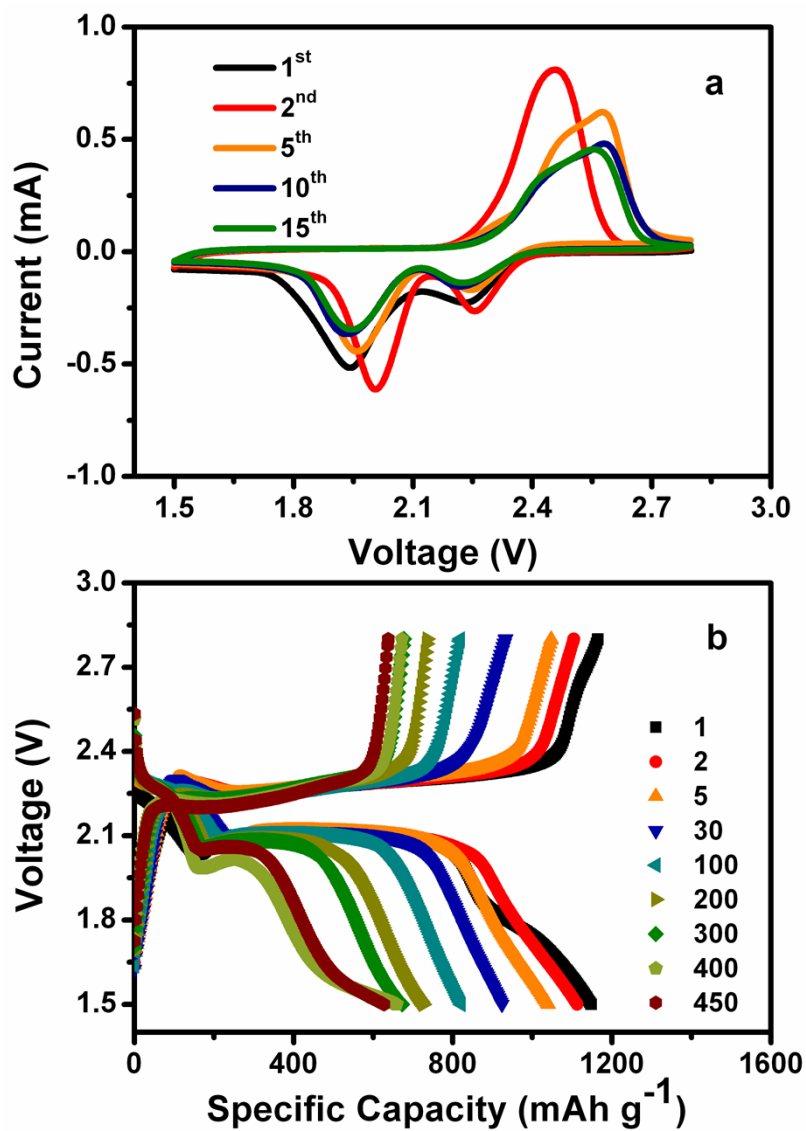

**Fig. S8.** a) Cyclic voltammogram and b) discharge-charge capacity vs. voltage profiles of Li-S cells with AICMK/S-20-20 cathode.

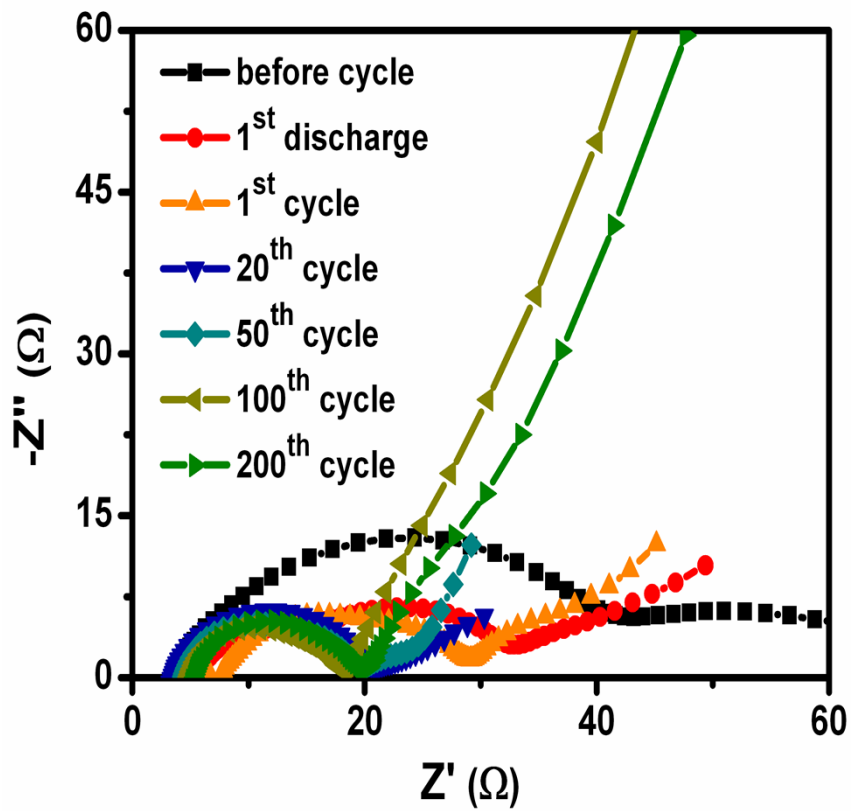

Fig. S9. EIS plots of the Li-S cell with AlCMK/S-20-20 cathode before and after cycles.
